# Supplementary material for: Highly efficient self-healable and dual responsive hydrogel-based deformable triboelectric nanogenerators for wearable electronics
Source: Royal Society of Chemistry journal article supplement (doi:10.1039/c9ta02711d), 2019-01-01
Supplement: c9ta02711d5.pdf [file c9ta02711d5.pdf]

## Supplementary Information

### Highly Efficient Self-Healable and Dual Responsive Hydrogel-Based Deformable Triboelectric Nanogenerators for Wearable Electronics

*Qingbao Guan<sup>a</sup>, Guanghui Lin<sup>b</sup>, Yuzhu Gong<sup>c</sup>, Jingfeng Wang<sup>b</sup>, Weiyi Tan<sup>c</sup>, Dequan Bao<sup>d</sup>, Yina Liu<sup>e</sup>, Zhengwei You<sup>a</sup>, Xuhui Sun<sup>d</sup>, Zhen Wen<sup>\*d,f</sup> and Yue Pan<sup>\*b</sup>*

<sup>a</sup>State Key Laboratory for Modification of Chemical Fibers and Polymer Materials, College of Materials Science and Engineering, Donghua University, Shanghai, 201620, China.

<sup>b</sup>Guangdong Provincial Key Laboratory of Malignant Tumor Epigenetics and Gene Regulation, Department of Cardiology, Medical Research Center, Sun Yat-Sen Memorial Hospital, Sun Yat-Sen University, Guangzhou, 510120, China.

E-mail: panyue@mail.sysu.edu.cn

<sup>c</sup>State and Local Joint Engineering Laboratory for Novel Functional Polymeric Materials, College of Chemistry, Chemical Engineering and Materials Science, Soochow University, Suzhou, 215123, China.

<sup>d</sup>Institute of Functional Nano and Soft Materials (FUNSOM), Jiangsu Key Laboratory for Carbon-Based Functional Materials and Devices, Soochow University, Suzhou 215123, China.

E-mail: wenzhen2011@suda.edu.cn

<sup>e</sup>Department of Mathematical Sciences, Xi'an Jiaotong-Liverpool University, Suzhou 215123, China.

<sup>f</sup>Nantong Textile & Silk Industrial Technology Research Institute, Jiangsu Industrial Technology Research Institute of Textile & Silk, Nantong 226314, China.

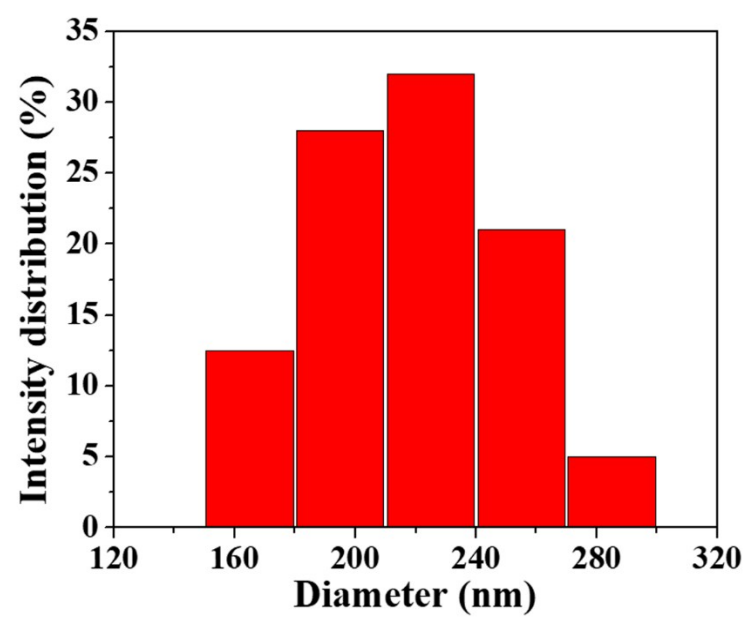

**Figure S1.** Diameter distribution of PDAP obtained from the oxidative polymerization of dopamine.

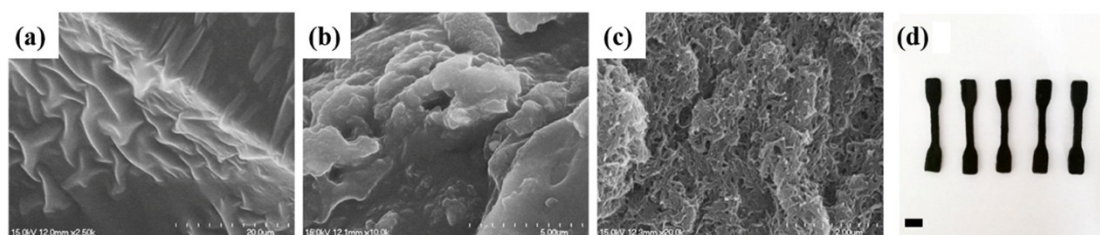

**Figure S2.** SEM images of cryogenically fractured hydrogel samples. (a) PVA, (b) PVA/PDAP, and (c) PVA/PDAP/MWCNT. (d) Digital image of PVA/PDAP/MWCNT hydrogel tensile test samples, (scale bar, 1 mm).

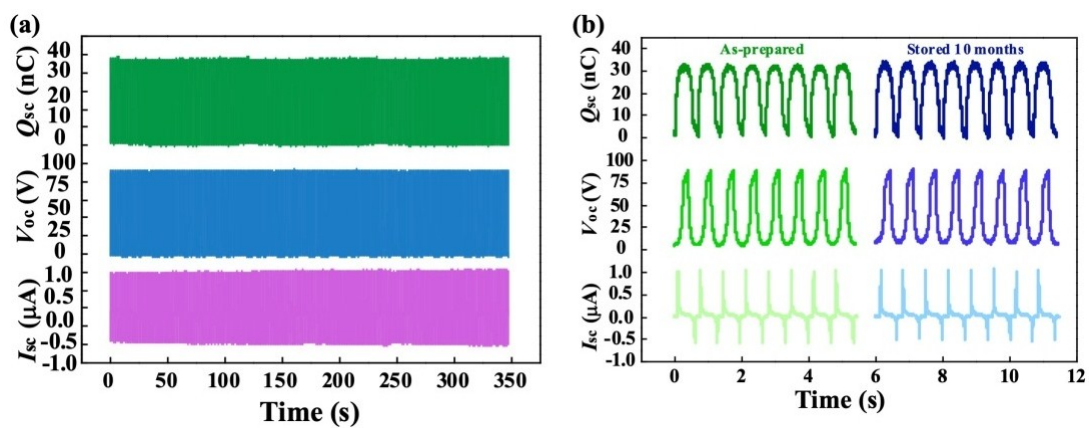

**Figure S3.** (a) The durability of the HS-TENG was tested for 500 cycles. (b) The stability of HS-TENG stored for 10 months was also evaluated.

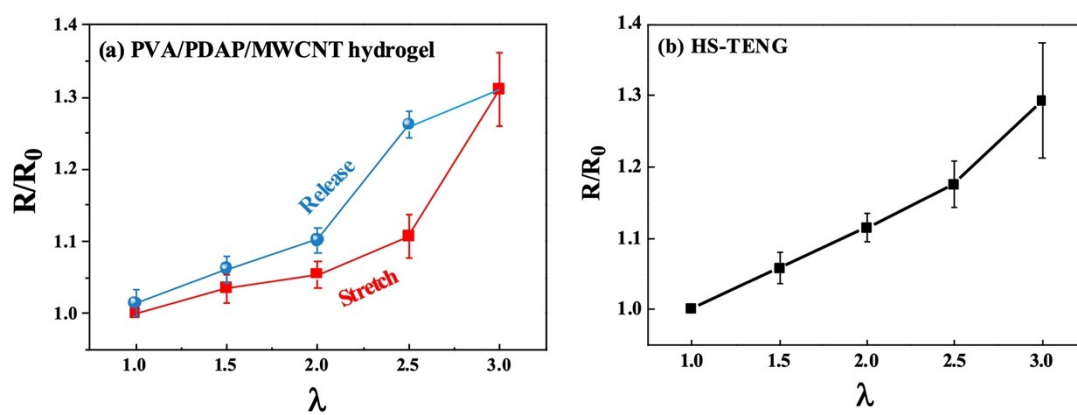

**Figure S4.** Resistance variation of PVA/PDAP/MWCNT hydrogel during stretch-release cycle (a) and HS-TENG (b) as a function of stretch ratio.

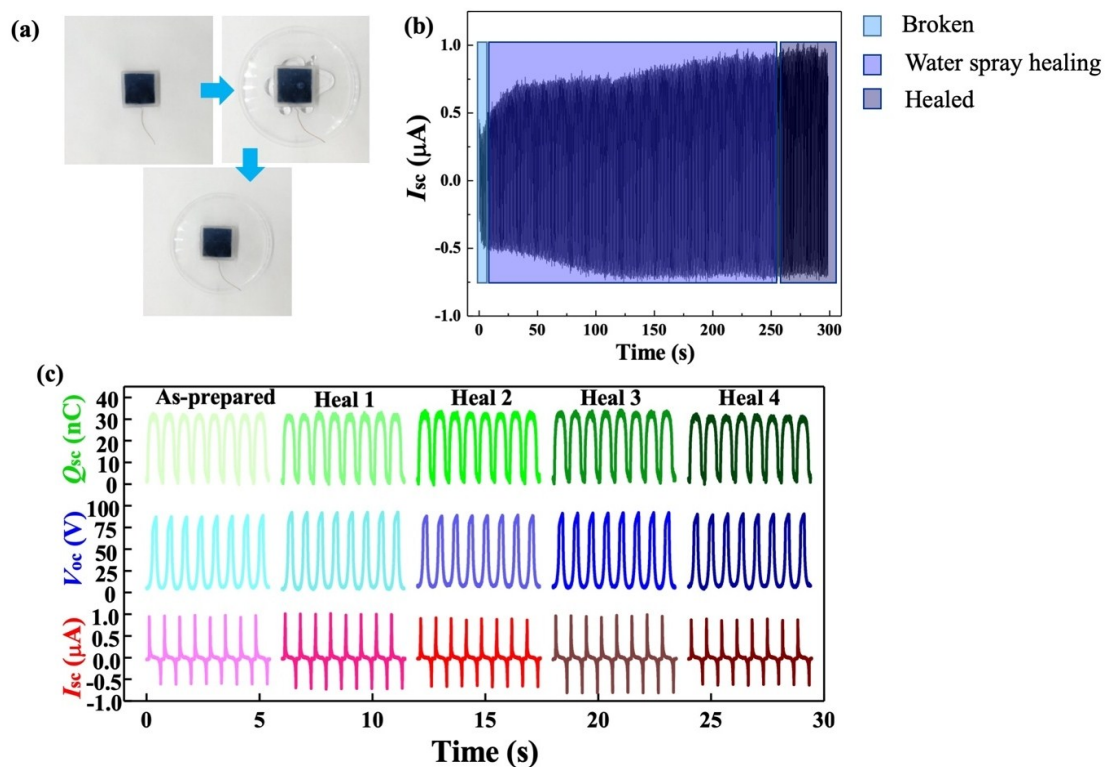

**Figure S5.** (a) Digital images of self-healing process induced by water for the PVA/PDAP/MWCNT HS-TENG after cutting by a razor blade. (b) The water triggered self-healing process of the output current of the PVA/PDAP/MWCNT HS-TENG was taken as a representative example. (c) The electrical output performance of the PVA/PDAP/MWCNT HS-TENG with four consecutive water triggered self-healing cycles.

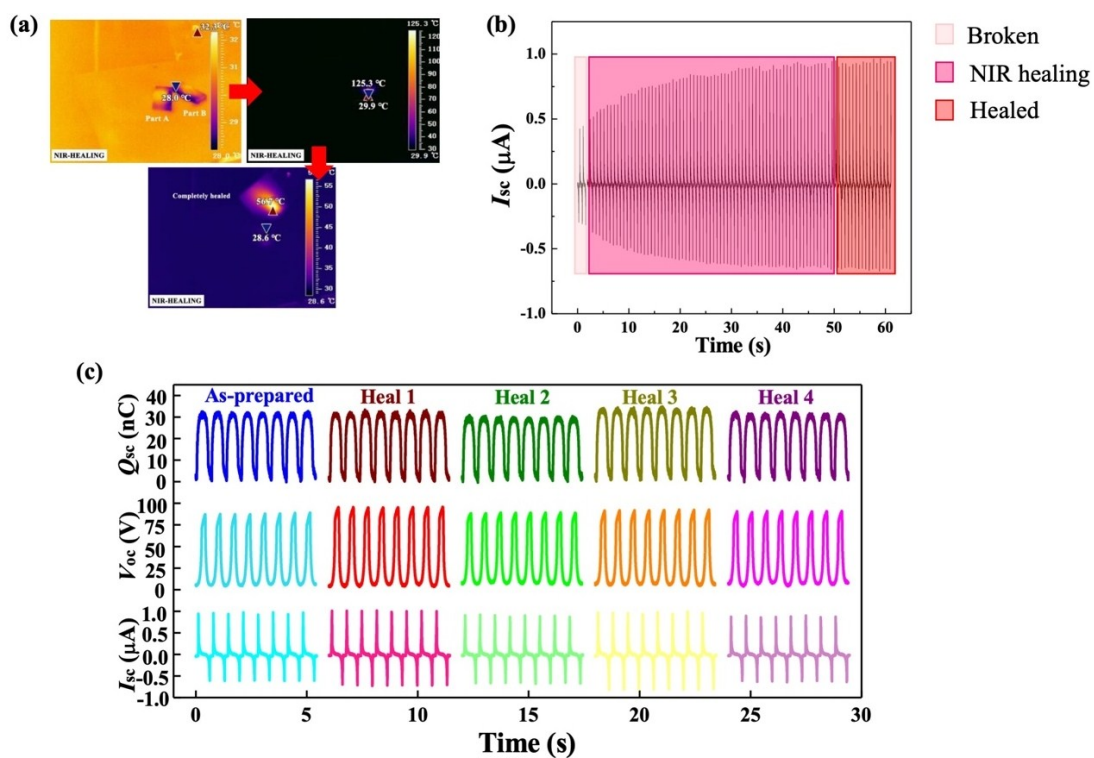

**Figure S6.** (a) Digital images of self-healing process induced by NIR for the PVA/PDAP/MWCNT HS-TENG after cutting by a razor blade. (b) The NIR triggered self-healing process of the output current of the PVA/PDAP/MWCNT HS-TENG was taken as a representative example. (c) The electrical output performance of the PVA/PDAP/MWCNT HS-TENG with four consecutive NIR triggered self-healing cycles.

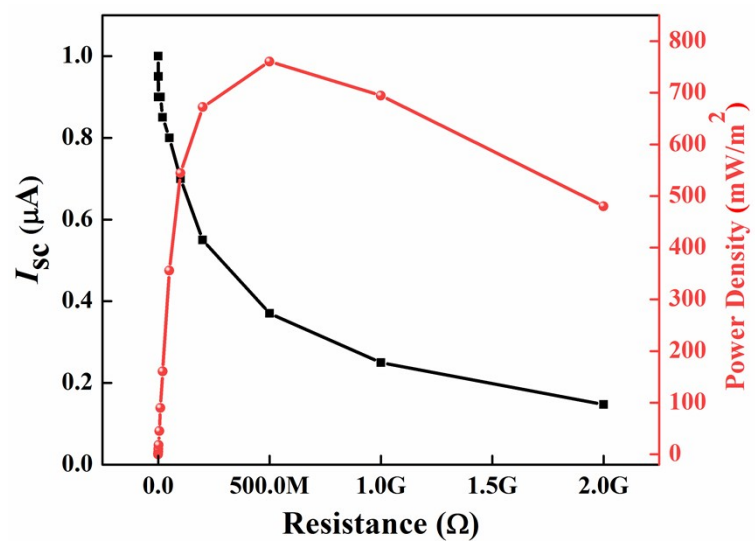

**Figure S7.** Output current density and output power density of HS-TENG with various external loads.



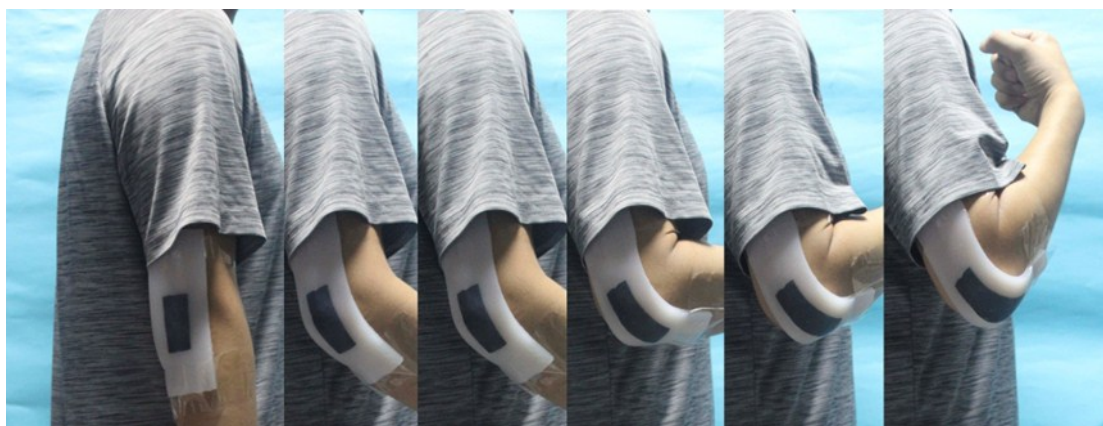

**Figure S8.** Photographs of stretching HS-TENG as a wearable device.

Table S1 Typical self-healing properties and electrical performance of self-healable triboelectric nanogenerators (TENGs)

| Sample name          | Self-healing component                                                           | Self-healing condition                                  | Self-healing efficiency (%) <sup>a</sup> | Tensile strength (KPa) | Stretchability (%) | Electrical performance of TENG <sup>b</sup> |                       |                        | Ref |
|----------------------|----------------------------------------------------------------------------------|---------------------------------------------------------|------------------------------------------|------------------------|--------------------|---------------------------------------------|-----------------------|------------------------|-----|
|                      |                                                                                  |                                                         |                                          |                        |                    | $Q_{sc}, Q'_{sc}$ (nC)                      | $V_{oc}, V'_{oc}$ (V) | $I_{sc}, I'_{sc}$ (μA) |     |
| PDMS-PU TENG         | Polydimethylsiloxane-polyurethane with disulfide bond                            | Thermal treatment at 65 °C for 2 h.                     | 90                                       | 870                    | 2745               | - <sup>c</sup> , - <sup>c</sup>             | 21.5, 21              | 2, 1.95                | [1] |
| IS-TENG              | Positive (Na <sup>+</sup> ) and negative ions (B(OH) <sub>4</sub> <sup>-</sup> ) | Pressed with hand at 25 °C for 25 min.                  | 81                                       | 3                      | 700                | 17, - <sup>c</sup>                          | 50, 50                | 6.5, - <sup>c</sup>    | [2] |
| VTENG                | Epoxy based vitrimer elastomer with dynamic disulfide bond                       | Thermal treatment at 65 °C for 4 h. or 95 °C for 0.5 h. | 100                                      | 700                    | 110                | 15, 14                                      | 55, 55                | 0.6, 0.5               | [3] |
| H-PDMS/Ag-PEDOT TENG | Dynamic covalent imine bonds                                                     | Curing at 21 °C for 12 h.                               | 94                                       | 116                    | 50                 | 34, - <sup>c</sup>                          | 100, 100              | 1, - <sup>c</sup>      | [4] |

Table S1 Continued

| Sample name | Self-healing component                                                                                                                                        | Self-healing condition                                                             | Self-healing efficiency (%) | Tensile strength (KPa) | Stretchability (%) | Electrical performance of TENG |                       |                        | Ref              |
|-------------|---------------------------------------------------------------------------------------------------------------------------------------------------------------|------------------------------------------------------------------------------------|-----------------------------|------------------------|--------------------|--------------------------------|-----------------------|------------------------|------------------|
|             |                                                                                                                                                               |                                                                                    |                             |                        |                    | $Q_{sc}, Q'_{sc}$ (nC)         | $V_{oc}, V'_{oc}$ (V) | $I_{sc}, I'_{sc}$ (μA) |                  |
| SH/CNT TENG | Epoxy resin-based polysulfide elastomer                                                                                                                       | Upon exposure of NIR light for 1 min.                                              | 90                          | 2600                   | 3                  | 16, 16                         | 50, 50                | 0.6, 0.6               | [5]              |
| HS-TENG     | 1 <sup>st</sup> route: photothermic - active polydopamine particle and multiwalled carbon nanotube<br>2 <sup>nd</sup> route: water-active dynamic borate bond | <b>Upon exposure of NIR light for 1 min. or water spraying at 25 °C for 5 min.</b> | 93                          | 80                     | 430                | 32, 32                         | 95, 95                | 1, 1                   | <b>This work</b> |

<sup>a</sup> Self-healing efficiency is characterized based on the tensile strength.

<sup>b</sup>  $Q_{sc}$ : short-circuit transferred charge,  $V_{oc}$ : open circuit voltage,  $I_{sc}$ : short-circuit current.  $Q'_{sc}$ ,  $V'_{oc}$ , and  $I'_{sc}$  are the electrical performance of TENGs obtained after self-healing. Note: For the comparison of electrical outputs of different TENG devices, it is extremely important to have the same magnitude and frequency of force application. Moreover, the device dimensions and the mode of force application should also be same. For effective comparison, the relative value of TENGs before and after healing should be compared instead of their absolute value.

<sup>c</sup>N/A

## Reference

- [1] Xu W, Huang L-B, Hao J. Fully self-healing and shape-tailorable triboelectric nanogenerators based on healable polymer and magnetic-assisted electrode. *Nano Energy*. **2017**; 40: 399-407.
- [2] Parida K, Kumar V, Jiangxin W, Bhavanasi V, Bendi R, Lee PS. Highly transparent, stretchable, and self-healing ionic-skin triboelectric nanogenerators for energy harvesting and touch applications. *Advanced Materials*. **2017**; 29, 1702181.
- [3] Deng J, Kuang X, Liu R, Ding W, Wang AC, Lai YC, et al. Vitrimers elastomer-based jigsaw puzzle-like healable triboelectric nanogenerator for self-powered wearable electronics. *Advanced Materials*. **2018**; 30: 1705918.
- [4] Sun J, Pu X, Liu M, Yu A, Du C, Zhai J, et al. Self-healable, stretchable, transparent triboelectric nanogenerators as soft power sources. *ACS Nano*. **2018**; 12: 6147-6155.
- [5] Guan Q, Dai Y, Yang Y, Bi X, Wen Z, Pan Y. Near-infrared irradiation induced remote and efficient self-healable triboelectric nanogenerator for potential implantable electronics. *Nano Energy*. **2018**; 51: 333-339.

Movie S1: Water triggered self-healing behavior of hydrogel sample. (AVI)

Movie S2: Self-healing behavior of hydrogel sample realized by NIR irradiation.  
(AVI)

Movie S3: Lighting 15 LEDs driven by tapping HS-TENG under various deformation. (AVI)

Movie S4: Wearable HS-TENG. (AVI)
